# Supplementary material for: Environmental Phenol and Paraben Exposure Risks and Their Potential Influence on the Gene Expression Involved in the Prognosis of Prostate Cancer
Source: MDPI journal article supplement (doi:10.3390/ijms23073679), 2022-03-27
Supplement: s1 [file s1]

## Supplementary materials

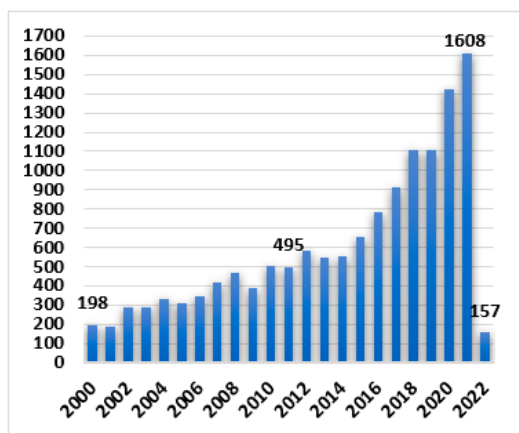

Figure S1: Articles on PubMed as of January 2022 when searched for Toxicity AND Food AND (Environmental AND Phenol) OR Paraben OR (Endocrine AND Disrupt). we found 1608 articles in 2021.

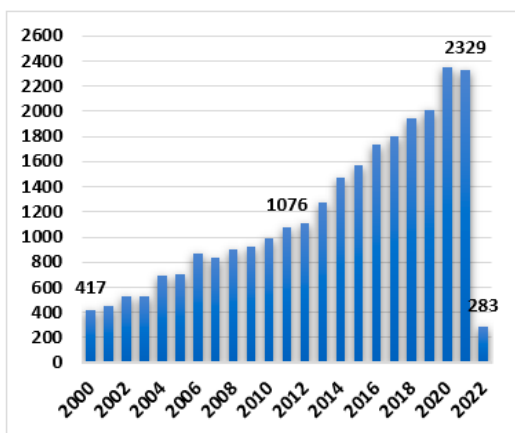

Figure S2: Articles on PubMed as of January 2022 when searched for Toxicity AND food AND Review. We searched on PubMed with specific keywords [(Review, Toxicity, Food)] and [(Toxicity AND Food AND (Environmental AND Phenol) OR Paraben OR (Endocrine AND Disrupt)], we found 2329 articles in 2021.

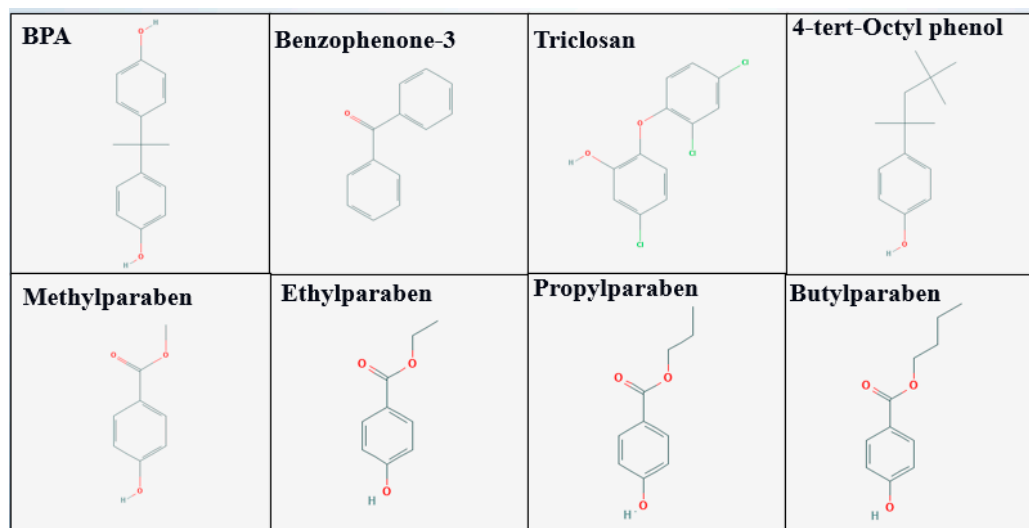

Figure S3: The chemical structure of the EPs and PBs chemicals.

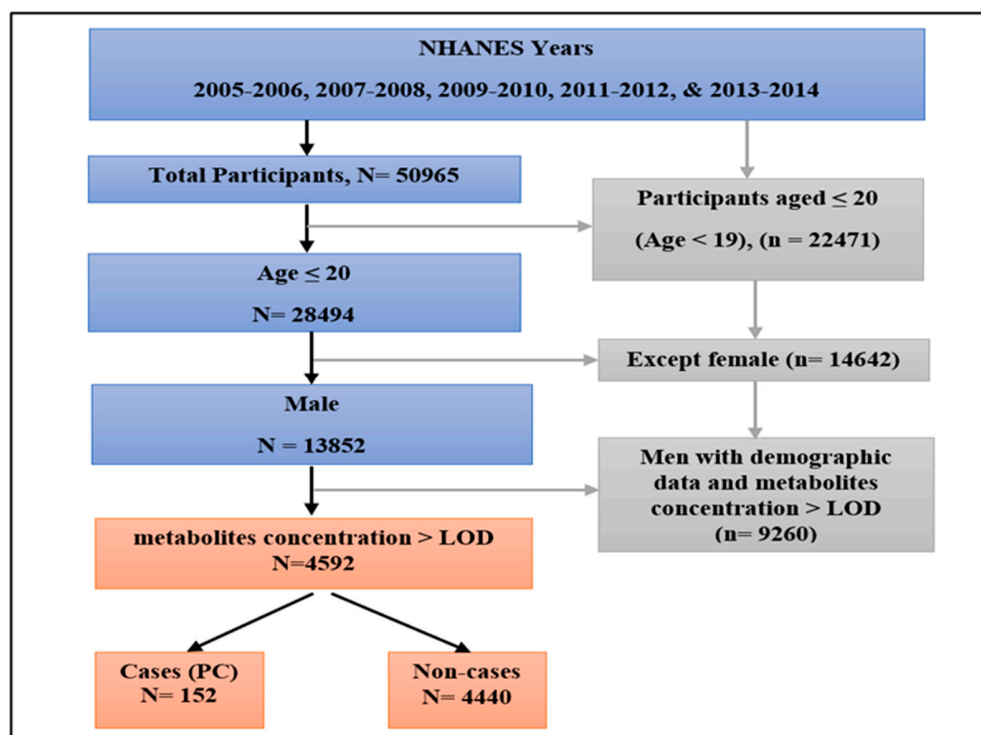

Figure S4: The flowchart of participants selection from NHANES (2005-2006, 2007-2008, 2009- 2010, 2011-2012, and 2013-2014).

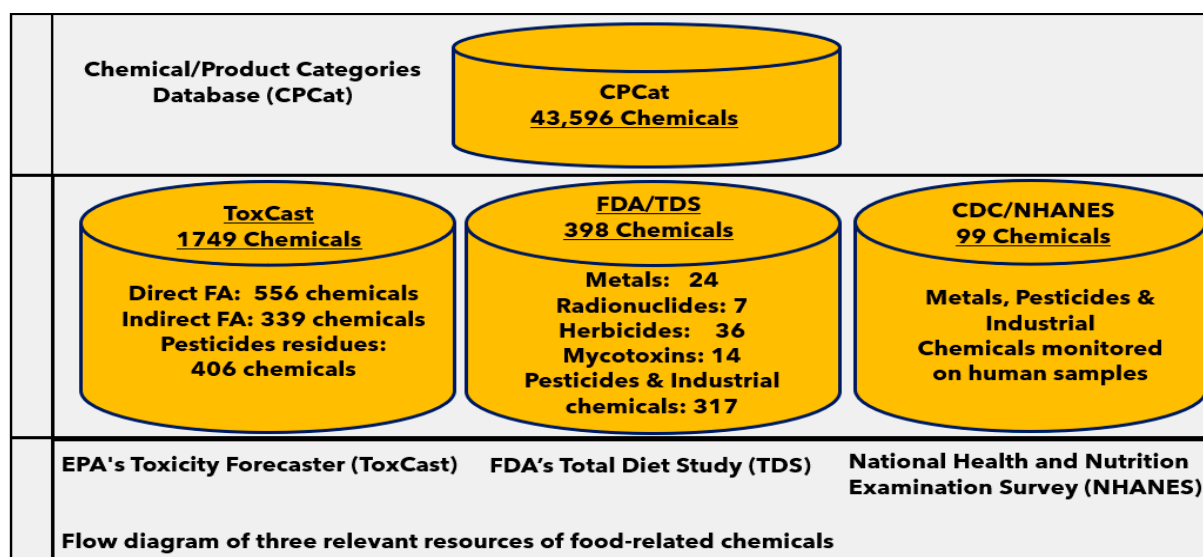

Figure S5: Electronic research of the following databases: The CPCat (Chemical and Product Categories), the EPA Toxicity Forecaster (ToxCast), and The FDA /Total Diet Study (TDS) through the Center for Food Safety and Applied Nutrition (CFSAN). CPCat is a database including information for more than 43,500 chemicals categorized by

their usage and function. CPCat was constructed by combining various and different data sources, including ACToR, UseDB, DfE, Dow, DrugBank, 2006 IUR, Kemi, and NICNAS. EPA Toxicity Forecaster (ToxCast) creates a database and predictive patterns on thousands of compounds. ToxCast applies high-throughput screening techniques and computational toxicology programs to sort, list, and prioritize chemicals. ToxCast database has nearly 2000 chemicals from various sources, such as food additives, industrial chemicals, and consumer products. In the ToxCast, compounds were categorized and classified into three food classes: (a) pesticide residues, (b) indirect food additives, (c) direct food additives. The FDA has carried the Total Diet Study (TDS) through the Center for Food Safety and Applied Nutrition (CFSAN). The TDS and CFSAN are designed to monitor and observe the US food supply for levels of toxic chemical contaminants such as toxic chemicals, pesticide residues, and industrial elements. The CFSAN study conducted from 2003 to 2014 targeted different compounds, analytes, and their numbers includes metals, radionuclides, mycotoxins, herbicides, pesticides, and industrial chemicals 24, 7, 14, 36, and 317, respectively.

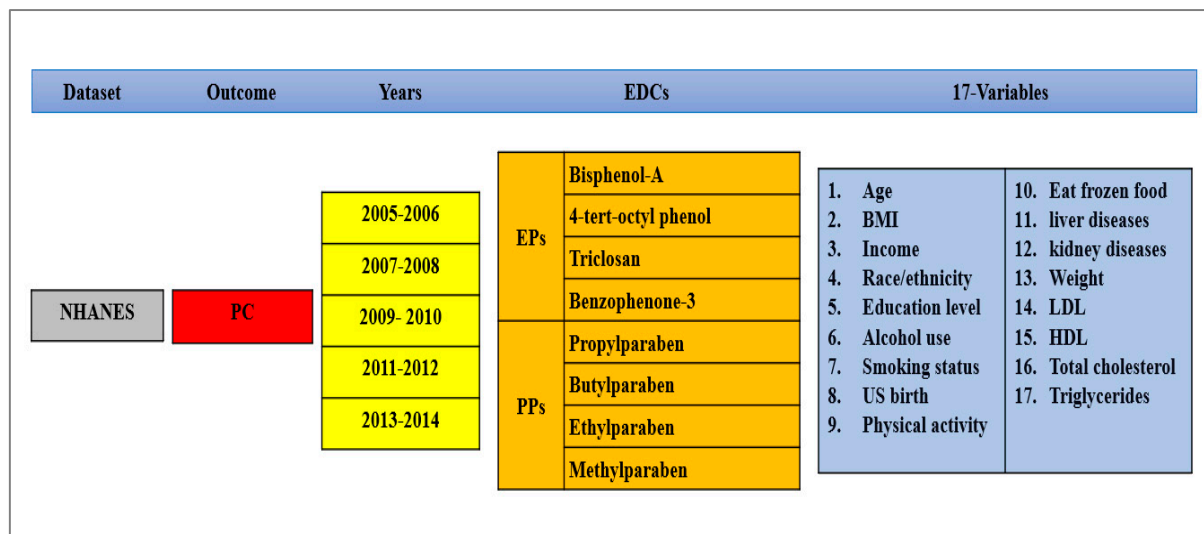

Figure S6: The research strategy's flowchart for the selection process of the outcome, years, chemicals, and variables from the NHANES dataset.

## Tables

Table S1: Analysis of significant levels of BPA (ng/ml) associated with the PCa cases and non-cases; NHANES 2005-2015 (\* P < 0.05).

| Variables                     | Non-Cases (N=4440) |                | PCa cases (N=152) |                | P-values |
|-------------------------------|--------------------|----------------|-------------------|----------------|----------|
|                               | n                  | Mean $\pm$ se  | n                 | Mean $\pm$ se  |          |
| Age                           |                    |                |                   |                |          |
| 20 – 49                       | 2195               | 2.5 $\pm$ 0.3  | 9*                | 2.6 $\pm$ 0.3  | 0.9942   |
| 50 – 69                       | 1481               | 2.5 $\pm$ 0.1  | 61*               | 5.0 $\pm$ 0.2  | <.0001   |
| $\geq$ 70                     | 764                | 2.4 $\pm$ 0.3  | 81*               | 10.7 $\pm$ 0.3 | <.0001   |
| BMI                           |                    |                |                   |                |          |
| $\leq$ 25                     | 1763               | 2.3 $\pm$ 0.06 | 35*               | 8.1 $\pm$ 0.6  | <.0001   |
| 25 to 30                      | 1362               | 2.7 $\pm$ 0.06 | 42*               | 7.8 $\pm$ 0.6  | <.0001   |
| $\geq$ 30                     | 1315               | 2.7 $\pm$ 0.07 | 75*               | 7.9 $\pm$ 0.4  | <.0001   |
| Race/ethnicity                |                    |                |                   |                |          |
| Non-Hispanic White            | 2115               | 2.4 $\pm$ 0.05 | 80*               | 8.3 $\pm$ 0.4  | <.0001   |
| Non-Hispanic Black            | 1387               | 2.3 $\pm$ 0.06 | 46*               | 7.4 $\pm$ 0.5  | <.0001   |
| Others                        | 938                | 2.8 $\pm$ 0.08 | 26*               | 7.9 $\pm$ 0.7  | <.0001   |
| Income (Annual Family Income) |                    |                |                   |                |          |
| $\leq$ \$24,999               | 1243               | 2.8 $\pm$ 0.07 | 47*               | 8.6 $\pm$ 0.5  | <.0001   |
| \$25,000 to \$ \$54,999       | 3197               | 2.5 $\pm$ 0.04 | 56*               | 7.9 $\pm$ 0.4  | <.0001   |
| \$55,000 to \$74,999          | 882                | 2.4 $\pm$ 0.07 | 22*               | 7.7 $\pm$ 0.2  | <.0001   |
| $\geq$ \$74,999               | 892                | 2.7 $\pm$ 0.08 | 27*               | 7.1 $\pm$ 0.8  | <.0001   |
| Education (N, %)              |                    |                |                   |                |          |
| $\leq$ 12 <sup>th</sup> grade | 2441               | 2.5 $\pm$ 0.05 | 78*               | 8.0 $\pm$ 0.4  | <.0001   |
| > 12 <sup>th</sup> grade      | 1999               | 2.6 $\pm$ 0.05 | 74*               | 7.9 $\pm$ 0.4  | <.0001   |
| Alcohol use (N, %)            |                    |                |                   |                |          |
| yes                           | 3050               | 2.7 $\pm$ 0.04 | 115*              | 7.9 $\pm$ 0.3  | <.0001   |
| No                            | 1390               | 2.2 $\pm$ 0.06 | 37*               | 8.2 $\pm$ 0.7  | <.0001   |
| Ever smoked (N, %)            |                    |                |                   |                |          |
| yes                           | 2218               | 2.6 $\pm$ 0.05 | 99*               | 8.6 $\pm$ 0.4  | <.0001   |
| No                            | 2222               | 2.4 $\pm$ 0.05 | 53*               | 6.8 $\pm$ 0.4  | <.0001   |
| US Birth (N, %)               |                    |                |                   |                |          |
| yes                           | 3307               | 2.6 $\pm$ 0.04 | 125*              | 8.3 $\pm$ 0.3  | <.0001   |
| No                            | 1133               | 2.4 $\pm$ 0.07 | 27*               | 6.3 $\pm$ 0.6  | <.0001   |
| Work activity (N, %)          |                    |                |                   |                |          |
| yes                           | 2025               | 2.4 $\pm$ 0.05 | 19*               | 7.5 $\pm$ 0.9  | <.0001   |
| No                            | 2415               | 2.6 $\pm$ 0.05 | 133*              | 8.0 $\pm$ 0.3  | <.0001   |
| Eat frozen food (N, %)        |                    |                |                   |                |          |
| yes                           | 1624               | 2.6 $\pm$ 0.06 | 131*              | 8.1 $\pm$ 0.3  | <.0001   |
| No                            | 2816               | 2.5 $\pm$ 0.04 | 21*               | 7.2 $\pm$ 0.8  | <.0001   |
| Liver/kidney diseases (N, %)  |                    |                |                   |                |          |
| yes                           | 100                | 2.6 $\pm$ 0.3  | 11*               | 8.0 $\pm$ 0.9  | <.0001   |
| No                            | 4340               | 2.5 $\pm$ 0.04 | 141*              | 7.9 $\pm$ 0.3  | <.0001   |

Table S2: Analysis of significantly levels of Benzophenone-3 (ng/ml) associated with the PCa cases and non-cases; NHANES 2005-2015 (\* P < 0.05).

| Variables                     | Non-Cases (N=4440) |           | PCa cases (N=152) |           | P-values |
|-------------------------------|--------------------|-----------|-------------------|-----------|----------|
|                               | n                  | Mean ± se | n                 | Mean ± se |          |
| Age                           |                    |           |                   |           |          |
| 20 – 49                       | 2195               | 5.5±1.0   | 9*                | 15.0±0.7  | <.0001   |
| 50 – 69                       | 1481               | 9.0±0.2   | 61*               | 18.7±0.3  | <.0001   |
| ≥ 70                          | 764                | 8.3±0.3   | 82*               | 23.7±0.3  | <.0001   |
| BMI                           |                    |           |                   |           |          |
| ≤ 25                          | 1763               | 7.4±0.16  | 35*               | 22.3±0.6  | <.0001   |
| 25 to 30                      | 1362               | 6.7±0.17  | 42*               | 21.3±0.5  | <.0001   |
| ≥ 30                          | 1315               | 7.1±0.17  | 75*               | 20.7±0.4  | <.0001   |
| Race/ethnicity                |                    |           |                   |           |          |
| Non-Hispanic White            | 2115               | 7.3±0.14  | 80*               | 21.6±0.4  | <.0001   |
| Non-Hispanic Black            | 1387               | 6.8±0.18  | 46*               | 20.7±0.6  | <.0001   |
| Others                        | 938                | 6.4±0.18  | 26*               | 21.0±0.7  | <.0001   |
| Income (Annual Family Income) |                    |           |                   |           |          |
| ≤ \$24,999                    | 1243               | 6.7±0.17  | 47*               | 21.7±0.5  | <.0001   |
| \$25,000 to \$ 54,999         | 3197               | 6.8±0.18  | 56*               | 21.4±0.5  | <.0001   |
| \$55,000 to \$74,999          | 882                | 6.6±0.20  | 22*               | 21.3±0.9  | <.0001   |
| ≥ \$74,999                    | 892                | 6.4±0.16  | 27*               | 20.2±0.8  | <.0001   |
| Education (N, %)              |                    |           |                   |           |          |
| ≤ 12 <sup>th</sup> grade      | 2441               | 7.3±0.13  | 78*               | 20.9±0.4  | <.0001   |
| > 12 <sup>th</sup> grade      | 1999               | 6.6±0.13  | 74*               | 21.6±0.4  | <.0001   |
| Alcohol use (N, %)            |                    |           |                   |           |          |
| yes                           | 3050               | 6.8±0.11  | 115*              | 21.1±0.3  | <.0001   |
| No                            | 1390               | 6.9±0.12  | 37*               | 21.7±0.5  | <.0001   |
| Ever smoked (N, %)            |                    |           |                   |           |          |
| yes                           | 2218               | 6.7±0.13  | 99*               | 21.6±0.4  | <.0001   |
| No                            | 2222               | 6.5±0.12  | 53*               | 20.1±0.5  | <.0001   |
| US Birth (N, %)               |                    |           |                   |           |          |
| yes                           | 3307               | 7.3±0.11  | 125*              | 21.6±0.3  | <.0001   |
| No                            | 1133               | 6.7±0.19  | 27*               | 19.4±0.7  | <.0001   |
| Work activity (N, %)          |                    |           |                   |           |          |
| yes                           | 2025               | 6.8±0.13  | 19*               | 20.7±0.7  | <.0001   |
| No                            | 2415               | 7.4±0.13  | 133               | 21.3±0.3  | <.0001   |
| Eat frozen food (N, %)        |                    |           |                   |           |          |
| yes                           | 1624               | 7.1±0.6   | 131*              | 21.4±0.3  | <.0001   |
| No                            | 2816               | 7.2±0.12  | 21*               | 20.0±0.8  | <.0001   |
| Liver/kidney diseases (N, %)  |                    |           |                   |           |          |
| yes                           | 100                | 7.4±0.61  | 11*               | 22.0±1.0  | <.0001   |
| No                            | 4340               | 7.1±0.09  | 141*              | 21.2±0.3  | <.0001   |

Table S3: Analysis of significant levels of Triclosan (ng/ml) associated with the PCa cases and non-cases; NHANES 2005-2015 (\* P < 0.05).

| Variables                     | Non-Cases (N=4440) |                | PCa cases (N=152) |                | P-values |
|-------------------------------|--------------------|----------------|-------------------|----------------|----------|
|                               | n                  | Mean $\pm$ se  | n                 | Mean $\pm$ se  |          |
| Age                           |                    |                |                   |                |          |
| 20 – 49                       | 2195               | 5.6 $\pm$ 0.09 | 9*                | 10.7 $\pm$ 0.3 | <.0001   |
| 50 – 69                       | 1481               | 6.2 $\pm$ 0.11 | 61*               | 14.8 $\pm$ 0.2 | <.0001   |
| $\geq$ 70                     | 764                | 6.1 $\pm$ 0.16 | 82*               | 19.3 $\pm$ 0.3 | <.0001   |
| BMI                           |                    |                |                   |                |          |
| $\leq$ 25                     | 1763               | 6.4 $\pm$ 0.11 | 35*               | 17.2 $\pm$ 0.5 | <.0001   |
| 25 to 30                      | 1362               | 5.6 $\pm$ 0.11 | 42*               | 16.6 $\pm$ 0.5 | <.0001   |
| $\geq$ 30                     | 1315               | 5.7 $\pm$ 0.11 | 75*               | 17.1 $\pm$ 0.4 | <.0001   |
| Race/ethnicity                |                    |                |                   |                |          |
| Non-Hispanic White            | 2115               | 6.4 $\pm$ 0.16 | 80*               | 17.1 $\pm$ 0.4 | <.0001   |
| Non-Hispanic Black            | 1387               | 6.1 $\pm$ 0.11 | 46*               | 16.6 $\pm$ 0.5 | <.0001   |
| Others                        | 938                | 5.8 $\pm$ 0.15 | 26*               | 17.4 $\pm$ 0.6 | <.0001   |
| Income (Annual Family Income) |                    |                |                   |                |          |
| $\leq$ \$24,999               | 1243               | 6.3 $\pm$ 0.16 | 47*               | 17.7 $\pm$ 0.4 | <.0001   |
| \$25,000 to \$ 54,999         | 3197               | 6.1 $\pm$ 0.16 | 56*               | 16.7 $\pm$ 0.5 | <.0001   |
| \$55,000 to \$74,999          | 882                | 5.9 $\pm$ 0.19 | 22*               | 16.8 $\pm$ 0.9 | <.0001   |
| $\geq$ \$74,999               | 892                | 6.1 $\pm$ 0.18 | 27*               | 16.5 $\pm$ 0.6 | <.0001   |
| Education (N, %)              |                    |                |                   |                |          |
| $\leq$ 12 <sup>th</sup> grade | 2441               | 6.1 $\pm$ 0.15 | 78*               | 17.0 $\pm$ 0.4 | <.0001   |
| > 12 <sup>th</sup> grade      | 1999               | 6.3 $\pm$ 0.16 | 74*               | 17.1 $\pm$ 0.4 | <.0001   |
| Alcohol use (N, %)            |                    |                |                   |                |          |
| yes                           | 3050               | 5.9 $\pm$ 0.11 | 115*              | 17.0 $\pm$ 0.3 | <.0001   |
| No                            | 1390               | 6.3 $\pm$ 0.12 | 37*               | 17.3 $\pm$ 0.5 | <.0001   |
| Ever smoked (N, %)            |                    |                |                   |                |          |
| yes                           | 2218               | 6.1 $\pm$ 0.15 | 99*               | 17.4 $\pm$ 0.3 | <.0001   |
| No                            | 2222               | 6.2 $\pm$ 0.19 | 53*               | 20.1 $\pm$ 0.5 | <.0001   |
| US Birth (N, %)               |                    |                |                   |                |          |
| yes                           | 3307               | 6.3 $\pm$ 0.14 | 125*              | 17.3 $\pm$ 0.3 | <.0001   |
| No                            | 1133               | 6.1 $\pm$ 0.18 | 27*               | 16.3 $\pm$ 0.7 | <.0001   |
| Work activity (N, %)          |                    |                |                   |                |          |
| yes                           | 2025               | 5.8 $\pm$ 0.14 | 19*               | 16.5 $\pm$ 0.6 | <.0001   |
| No                            | 2415               | 6.2 $\pm$ 0.12 | 133*              | 17.1 $\pm$ 0.3 | <.0001   |
| Eat frozen food (N, %)        |                    |                |                   |                |          |
| yes                           | 1624               | 6.5 $\pm$ 0.4  | 131*              | 17.1 $\pm$ 0.3 | <.0001   |
| No                            | 2816               | 5.9 $\pm$ 1.1  | 21*               | 16.3 $\pm$ 0.8 | <.0001   |
| Liver/kidney diseases (N, %)  |                    |                |                   |                |          |
| yes                           | 100                | 6.3 $\pm$ .016 | 11*               | 17.4 $\pm$ 1.0 | <.0001   |
| No                            | 4340               | 6.2 $\pm$ 0.12 | 141*              | 17.0 $\pm$ 0.3 | <.0001   |

Table S4: Analysis of significant levels of Ethylparaben (ng/ml) associated with the PCa cases and non-cases; NHANES 2005-2015 (\* P < 0.05)

| Variables                     | Non-Cases (N=4440) |           | PCa cases (N=152) |           | P-values |
|-------------------------------|--------------------|-----------|-------------------|-----------|----------|
|                               | n                  | Mean ± se | n                 | Mean ± se |          |
| Age                           |                    |           |                   |           |          |
| 20 – 49                       | 2195               | 2.2±0.06  | 9*                | 9.9±0.8   | <.0001   |
| 50 – 69                       | 1481               | 2.4±0.08  | 61*               | 10.0±0.4  | <.0001   |
| ≥ 70                          | 764                | 2.4±0.11  | 82*               | 15.1±0.3  | <.0001   |
| BMI                           |                    |           |                   |           |          |
| ≤ 25                          | 1763               | 2.4±0.07  | 35*               | 13.3±0.7  | <.0001   |
| 25 to 30                      | 1362               | 2.1±0.01  | 42*               | 12.0±0.7  | <.0001   |
| ≥ 30                          | 1315               | 2.3±0.08  | 75*               | 12.9±0.4  | <.0001   |
| Race/ethnicity                |                    |           |                   |           |          |
| Non-Hispanic White            | 2115               | 2.1±0.05  | 80*               | 12.4±0.5  | <.0001   |
| Non-Hispanic Black            | 1387               | 2.3±0.06  | 46*               | 12.8±0.6  | <.0001   |
| Others                        | 938                | 2.2±0.10  | 26*               | 13.7±0.8  | <.0001   |
| Income (Annual Family Income) |                    |           |                   |           |          |
| ≤ \$24,999                    | 1243               | 2.4±0.06  | 47*               | 13.3±0.5  | <.0001   |
| \$25,000 to \$ 54,999         | 3197               | 2.0±0.06  | 56*               | 12.4±0.6  | <.0001   |
| \$55,000 to \$74,999          | 882                | 2.1±0.08  | 22*               | 12.8±0.9  | <.0001   |
| ≥ \$74,999                    | 892                | 2.2±0.07  | 27*               | 12.3±0.8  | <.0001   |
| Education (N, %)              |                    |           |                   |           |          |
| ≤ 12 <sup>th</sup> grade      | 2441               | 2.0±0.06  | 78*               | 12.3±0.5  | <.0001   |
| > 12 <sup>th</sup> grade      | 1999               | 2.1±0.08  | 74*               | 13.2±0.5  | <.0001   |
| Alcohol use (N, %)            |                    |           |                   |           |          |
| yes                           | 3050               | 2.3±0.06  | 115*              | 12.5±0.4  | <.0001   |
| No                            | 1390               | 2.4±0.10  | 37*               | 13.6±0.6  | <.0001   |
| Ever smoked (N, %)            |                    |           |                   |           |          |
| yes                           | 2218               | 2.4±0.06  | 99*               | 13.0±0.4  | <.0001   |
| No                            | 2222               | 2.0±0.06  | 53*               | 12.3±0.5  | <.0001   |
| US Birth (N, %)               |                    |           |                   |           |          |
| yes                           | 3307               | 2.3±0.06  | 125*              | 13.0±0.4  | <.0001   |
| No                            | 1133               | 2.2±0.10  | 27*               | 11.6±0.7  | <.0001   |
| Work activity (N, %)          |                    |           |                   |           |          |
| yes                           | 2025               | 2.2±0.06  | 19*               | 12.3±0.9  | <.0001   |
| No                            | 2415               | 2.4±0.08  | 133*              | 12.8±0.4  | 0.1475   |
| Eat frozen food (N, %)        |                    |           |                   |           |          |
| yes                           | 1624               | 2.4±0.06  | 131*              | 12.9±0.4  | <.0001   |
| No                            | 2816               | 2.3±0.04  | 21*               | 12.0±0.9  | <.0001   |
| Liver/kidney diseases (N, %)  |                    |           |                   |           |          |
| yes                           | 100                | 2.4±0.07  | 11*               | 13.8±1.2  | <.0001   |
| No                            | 4340               | 2.1±0.05  | 141*              | 12.7±0.3  | <.0001   |

Table S5: Analysis of significant levels of Methylparaben (ng/ml) associated with the PCa cases and non-cases; NHANES 2005-2015 (\* P < 0.05).

| Variables                     | Non-Cases (N=4440) |           | PCa cases (N=152) |           | P-values |
|-------------------------------|--------------------|-----------|-------------------|-----------|----------|
|                               | n                  | Mean ± se | n                 | Mean ± se |          |
| Age                           |                    |           |                   |           |          |
| 20 – 49                       | 2195               | 8.8±0.09  | 9**               | 9.3±0.3   | 0.7202   |
| 50 – 69                       | 1481               | 9.9±0.1   | 61*               | 14.6±0.3  | <.0001   |
| ≥ 70                          | 764                | 9.8±0.2   | 82*               | 18.9±0.3  | <.0001   |
| BMI                           |                    |           |                   |           |          |
| ≤ 25                          | 1763               | 9.4±0.09  | 35                | 17.0±0.6  | <.0001   |
| 25 to 30                      | 1362               | 9.3±0.10  | 42                | 16.0±0.7  | <.0001   |
| ≥ 30                          | 1315               | 9.3±0.10  | 75                | 17.0±0.4  | <.0001   |
| Race/ethnicity                |                    |           |                   |           |          |
| Non-Hispanic White            | 2115               | 9.1±0.07  | 80                | 16.5±0.4  | <.0001   |
| Non-Hispanic Black            | 1387               | 9.3±0.09  | 46                | 16.3±0.6  | <.0001   |
| Others                        | 938                | 9.6±0.10  | 26                | 17.3±0.8  | <.0001   |
| Income (Annual Family Income) |                    |           |                   |           |          |
| ≤ \$24,999                    | 1243               | 9.1±1.0   | 47                | 17.3±0.6  | <.0001   |
| \$25,000 to \$ 54,999         | 3197               | 9.0±0.9   | 56                | 16.1±0.5  | <.0001   |
| \$55,000 to \$74,999          | 882                | 8.9±0.8   | 22                | 17.1±0.9  | <.0001   |
| ≥ \$74,999                    | 892                | 9.2±0.9   | 27                | 16.2±0.7  | <.0001   |
| Education (N, %)              |                    |           |                   |           |          |
| ≤ 12 <sup>th</sup> grade      | 2441               | 8.8±0.09  | 78                | 16.4±0.4  | <.0001   |
| > 12 <sup>th</sup> grade      | 1999               | 9.9±0.1   | 74                | 17.0±0.4  | <.0001   |
| Alcohol use (N, %)            |                    |           |                   |           |          |
| yes                           | 3050               | 9.5±0.09  | 115               | 16.4±0.3  | <.0001   |
| No                            | 1390               | 9.4±0.1   | 37                | 17.3±0.6  | <.0001   |
| Ever smoked (N, %)            |                    |           |                   |           |          |
| yes                           | 2218               | 9.1±0.08  | 99                | 17.0±0.4  | 0.0001   |
| No                            | 2222               | 9.5±0.09  | 53                | 16.0±0.5  | <.0001   |
| US Birth (N, %)               |                    |           |                   |           |          |
| yes                           | 3307               | 9.4±0.1   | 125               | 17.0±0.3  | <.0001   |
| No                            | 1133               | 9.6±0.08  | 27                | 15.0±0.7  | <.0001   |
| Work activity (N, %)          |                    |           |                   |           |          |
| yes                           | 2025               | 9.1±0.08  | 19                | 16.1±0.7  | <.0001   |
| No                            | 2415               | 9.5±0.09  | 133               | 16.7±0.3  | <.0001   |
| Eat frozen food (N, %)        |                    |           |                   |           |          |
| yes                           | 1624               | 9.4±0.1   | 131               | 17.0±0.3  | <.0001   |
| No                            | 2816               | 9.6±0.08  | 21                | 16.±1.0   | <.0001   |
| Liver/kidney diseases (N, %)  |                    |           |                   |           |          |
| yes                           | 100                | 9.3±0.08  | 11                | 17.3±1.2  | <.0001   |
| No                            | 4340               | 9.5±0.09  | 141               | 16.5±0.3  | <.0001   |

Table S6: Analysis of significant levels of Propylparaben (ng/ml) and associated with the PCa cases and non-cases; NHANES 2005-2015 (\* P < 0.05).

| Variables                     | Non-Cases (N=4440) |           | PCa cases (N=152) |           | P-values |
|-------------------------------|--------------------|-----------|-------------------|-----------|----------|
|                               | n                  | Mean ± se | n                 | Mean ± se |          |
| Age                           |                    |           |                   |           |          |
| 20 – 49                       | 2195               | 3.1±0.07  | 9                 | 10.4±0.3  | <.0001   |
| 50 – 69                       | 1481               | 4.1±0.10  | 61                | 13.8±0.3  | <.0001   |
| ≥ 70                          | 764                | 4.3±0.20  | 82                | 17.6±0.2  | <.0001   |
| BMI                           |                    |           |                   |           |          |
| ≤ 25                          | 1763               | 3.5±0.08  | 35                | 16.6±0.9  | <.0001   |
| 25 to 30                      | 1362               | 3.6±0.08  | 42                | 15.7±0.4  | <.0001   |
| ≥ 30                          | 1315               | 3.7±0.07  | 75                | 15.3±0.4  | <.0001   |
| Race/ethnicity                |                    |           |                   |           |          |
| Non-Hispanic White            | 2115               | 3.3±0.06  | 80                | 15.6±0.3  | <.0001   |
| Non-Hispanic Black            | 1387               | 3.5±0.08  | 46                | 15.6±0.5  | <.0001   |
| Others                        | 938                | 3.6±0.07  | 26                | 16.1±0.6  | <.0001   |
| Income (Annual Family Income) |                    |           |                   |           |          |
| ≤ \$24,999                    | 1243               | 3.4±0.06  | 47                | 16.2±0.4  | <.0001   |
| \$25,000 to \$ 54,999         | 3197               | 3.5±0.08  | 56                | 15.8±0.4  | <.0001   |
| \$55,000 to \$74,999          | 882                | 3.6±0.10  | 22                | 15.5±0.7  | <.0001   |
| ≥ \$74,999                    | 892                | 3.1±0.07  | 27                | 15.0±0.7  | <.0001   |
| Education (N, %)              |                    |           |                   |           |          |
| ≤ 12 <sup>th</sup> grade      | 2441               | 3.7±0.07  | 78                | 15.5±0.4  | <.0001   |
| > 12 <sup>th</sup> grade      | 1999               | 4.1±0.10  | 74                | 16.0±0.3  | <.0001   |
| Alcohol use (N, %)            |                    |           |                   |           |          |
| yes                           | 3050               | 3.6±0.10  | 115               | 15.6±0.3  | <.0001   |
| No                            | 1390               | 3.1±0.07  | 37                | 16.4±0.6  | <.0001   |
| Ever smoked (N, %)            |                    |           |                   |           |          |
| yes                           | 2218               | 3.5±0.08  | 99                | 15.9±0.3  | <.0001   |
| No                            | 2222               | 3.6±0.10  | 53                | 15.4±0.4  | <.0001   |
| US Birth (N, %)               |                    |           |                   |           |          |
| yes                           | 3307               | 3.6±0.10  | 125               | 15.0±0.3  | <.0001   |
| No                            | 1133               | 4.1±0.07  | 27                | 14.6±0.6  | <.0001   |
| Work activity (N, %)          |                    |           |                   |           |          |
| yes                           | 2025               | 3.4±0.06  | 19                | 15.7±0.6  | <.0001   |
| No                            | 2415               | 3.5±0.08  | 133               | 16.7±0.3  | <.0001   |
| Eat frozen food (N, %)        |                    |           |                   |           |          |
| yes                           | 1624               | 3.6±0.10  | 131               | 15.9±0.3  | <.0001   |
| No                            | 2816               | 3.1±0.07  | 21                | 14.8±0.8  | <.0001   |
| Liver/kidney diseases (N, %)  |                    |           |                   |           |          |
| yes                           | 100                | 3.6±0.10  | 11                | 16.1±1.2  | <.0001   |
| No                            | 4340               | 3.2±0.07  | 141               | 15.7±0.3  | <.0001   |

Table S7: A summary of genes identified by various gene analysis tools for 81 Overlapping Genes associated with PCa, EPs, and PBs.

| # | Term                               | Gene identified by         | Count | Genes                                                                                                                                                                                                                                       |
|---|------------------------------------|----------------------------|-------|---------------------------------------------------------------------------------------------------------------------------------------------------------------------------------------------------------------------------------------------|
| 1 | Prostate Cancer                    | DAVID- GAD <sup>1</sup>    | 35    | CDKN1A, CDKN1B, LHB, SERPINE1, KLK3, KLK2, NR3C1, CYP19A1, CYP17A1, CASP9, CCND1, PLAU, CDH1, MYC, DNMT3B, CYP1B1, CD14, NCOA2, NOS2, EGF, UGT2B15, IGF1, ESR1, ESR2, GNMT, VEGFA, AR, IL1B, SELENOP, CYP1A1, BCL2, ID3, PPARA, SHBG, TP53. |
| 2 | Prostate cancer                    | KEGG- PCa Pathway          | 13    | BCL2, AR, CASP9, CCND1, CDKN1A, CDKN1B, EGF, GSK3B, HSP90B1, IGF1, KLK3, MAPK3, TP53.                                                                                                                                                       |
| 3 | Genes important in the PPI-network | CytoHubba-MCC <sup>2</sup> | 10    | CCND1, VEGFA, EGF, MYC, CASP3, IGF1, STAT3, TP53, ESR1, CDH1.                                                                                                                                                                               |
| 4 | Hub-Genes1                         | MCODE- Module1             | 26    | MYC, ESR2, MET, SERPINE1, SOX2, AR, VEGFA, CDKN1A, CCND1, TP53, MAPK3, EGF, ESR1, EGR1, CASP9, HMOX1, IGF, STAT3, CDKN15, CDH1, IL1B, GSK3B, PPARA, MAPK8, EGR1, CASP3.                                                                     |
| 5 | Hub-Genes2                         | MCODE- Module2             | 5     | BUB1B, TOP2A, UBE2C, RRM2, CENPF.                                                                                                                                                                                                           |

<sup>1</sup>DAVID- GAD: DAVID-Gene Association Diseases Database (GAD), <sup>2</sup>Maximal Clique Centrality (MCC)

Table S8: Gene ontology and pathway enrichment analysis of EPs and PBs influenced 81 overlapping Genes' and their curated function in PCa (top five in biological process (BP), cell component (CC), molecular function (MF), and in KEGG pathway).

|   | BP         | Term                                                                 | Count | P-Value                | Genes                                                                                                                                                                                                                                                                                           |
|---|------------|----------------------------------------------------------------------|-------|------------------------|-------------------------------------------------------------------------------------------------------------------------------------------------------------------------------------------------------------------------------------------------------------------------------------------------|
| 1 | GO:0032355 | Response to estradiol                                                | 14    | 2.76X10 <sup>-16</sup> | FOXA1, CDKN1B, PCNA, STAT3, ESR1, CASP9, COL1A1, CCND1, MYC, CASP3, ALDH1A2, RARA, DNMT3B, CD38                                                                                                                                                                                                 |
| 2 | GO:0045944 | Positive regulation of transcription from RNA polymerase II promoter | 27    | 1.63X10 <sup>-13</sup> | FOXA1, TOP2A, GSK3B, NR1I2, SERPINE1, TWIST1, NR3C1, SOX2, EPCAM, MYC, MAPK3, SREBF1, NCOA2, EGR1, PRRX1, STAT3, IGF1, ESR1, VEGFA, AR, IL1B, RARA, CDH13, PPARA, MET, TP53, ATF3                                                                                                               |
| 3 | GO:0042493 | Response to drug                                                     | 16    | 9.91X10 <sup>-12</sup> | SREBF1, ABCC4, CDKN1A, CDKN1B, STAT3, COL1A1, CENPF, CCND1, CDH1, MYC, CASP3, CYP1A1, BCL2, DNMT3B, CD38, B2M                                                                                                                                                                                   |
| 4 | GO:0045893 | Positive regulation of transcription, DNA-templated                  | 18    | 1.99X10 <sup>-10</sup> | EGR1, EGF, STAT3, NR1I2, IGF1, ESR1, ESR2, SOX2, COL1A1, AR, CDH1, MYC, IL1B, RARA, CD38, PPARA, TP53, MAPK3                                                                                                                                                                                    |
| 5 | GO:0043066 | negative regulation of apoptotic process                             | 17    | 2.92X10 <sup>-10</sup> | GSK3B, CDKN1A, CDKN1B, STAT3, TWIST1, IGF1, HSP90B1, VEGFA, MAPK8, EPCAM, MYC, CASP3, BCL2, RARA, BIRC5, CD38, TP53                                                                                                                                                                             |
|   | CC         | Term                                                                 | Count | P-Value                |                                                                                                                                                                                                                                                                                                 |
| 1 | GO:0043234 | Protein complex                                                      | 12    | 1.78X10 <sup>-06</sup> | TOP2A, ACTA2, SREBF1, AR, CDKN1A, CDKN1B, MYC, KLK3, NR3C1, TP53, CLU, MAPK3                                                                                                                                                                                                                    |
| 2 | GO:0005654 | Nucleoplasm                                                          | 30    | 3.25X10 <sup>-06</sup> | TOP2A, CDKN1A, CDKN1B, PCNA, NR1I2, JADE2, NR3C1, SOX2, MAPK8, CCND1, MYC, CASP3, DNMT3B, MAPK3, SREBF1, NCOA2, EGR1, RRM2, UBE2C, STAT3, ESR1, ESR2, AR, CENPF, RARA, ID3, BIRC5, PPARA, TP53, ATF3                                                                                            |
| 3 | GO:0005615 | Extracellular space                                                  | 20    | 4.22X10 <sup>-06</sup> | EGF, LHB, SERPINE1, KLK3, FASLG, IGF1, CLU, VEGFA, ACTA2, COL1A1, ERBB3, PLAU, IL1B, SELENOP, TNFSF10, CDH13, HMOX1, CD14, MUC4, B2M                                                                                                                                                            |
| 4 | GO:0005634 | Nucleus                                                              | 44    | 5.89X10 <sup>-06</sup> | FOXA1, TOP2A, GSK3B, CDKN1A, CDKN1B, PCNA, NR1I2, TWIST1, KLK3, FASLG, NR3C1, CLU, HSP90B1, SOX2, CASP9, MAPK8, CCND1, MYC, CASP3, DNMT3B, HMOX1, CD38, MAPK3, SREBF1, NCOA2, EGR1, RRM2, PDHA1, PRRX1, NOS2, STAT3, ESR1, ESR2, AR, CENPF, BCL2, RARA, BAX, SP5, ID3, BIRC5, PPARA, TP53, ATF3 |
| 5 | GO:0005829 | Cytosol                                                              | 32    | 1.24X10 <sup>-05</sup> | GSK3B, CDKN1A, CDKN1B, BUB1B, CLU, HSP90B1, SOX2, CASP9, MAPK8, CCND1, SULT1E1, MYC, CASP3, STMN1, HMOX1, MAPK3, SREBF1, RRM2, NOS2, UBE2C, IDH1, STAT3, GNMT, ACTA2, AR, CENPF, ALDH1A2, IL1B, BCL2, BAX, BIRC5, TP53                                                                          |
|   | MF         | Term                                                                 | Count | P-Value                |                                                                                                                                                                                                                                                                                                 |
| 1 | GO:0008134 | Transcription factor binding                                         | 14    | 7.58X10 <sup>-10</sup> | FOXA1, NCOA2, STAT3, TWIST1, ESR1, AR, CENPF, CCND1, MYC, BCL2, RARA, ID3, PPARA, TP53                                                                                                                                                                                                          |
| 2 | GO:0043565 | Sequence-specific DNA binding                                        | 15    | 1.30X10 <sup>-07</sup> | FOXA1, EGR1, PRRX1, NR1I2, NR3C1, ESR1, ESR2, SOX2, AR, MYC, BCL2, RARA, PPARA, TP53, ATF3                                                                                                                                                                                                      |

|       |            |                                   |       |                        |                                                                                                                                                                 |
|-------|------------|-----------------------------------|-------|------------------------|-----------------------------------------------------------------------------------------------------------------------------------------------------------------|
| 3     | GO:0005496 | Steroid binding                   | 6     | 1.57X10 <sup>-07</sup> | AR, SULT1E1, NR3C1, SHBG, ESR1, ESR2                                                                                                                            |
| 4     | GO:0003707 | Steroid hormone receptor activity | 7     | 2.52X10 <sup>-07</sup> | AR, NR1I2, RARA, PPARA, NR3C1, ESR1, ESR2                                                                                                                       |
| 5     | GO:0019899 | Enzyme binding                    | 12    | 4.65X10 <sup>-07</sup> | TOP2A, AR, MAPK8, PCNA, CCND1, CYP1A1, RARA, HMOX1, BIRC5, ESR1, TP53, ESR2                                                                                     |
| <hr/> |            |                                   |       |                        |                                                                                                                                                                 |
|       | KEGG       | Term                              | Count | P-Value                |                                                                                                                                                                 |
| 1     | hsa05200:  | Pathways in cancer                | 25    | 7.37X10 <sup>-14</sup> | GSK3B, CDKN1A, CDKN1B, KLK3, FASLG, HSP90B1, CASP9, MAPK8, CCND1, CDH1, MYC, CASP3, MAPK3, NOS2, EGF, STAT3, IGF1, VEGFA, AR, BCL2, RARA, BAX, BIRC5, MET, TP53 |
| 2     | hsa05215:  | Prostate cancer                   | 13    | 3.01X10 <sup>-11</sup> | GSK3B, CDKN1A, CDKN1B, EGF, KLK3, IGF1, HSP90B1, CASP9, AR, CCND1, BCL2, TP53, MAPK3                                                                            |
| 3     | hsa05161:  | Hepatitis B                       | 15    | 6.83X10 <sup>-11</sup> | CDKN1A, CDKN1B, PCNA, STAT3, FASLG, CASP9, MAPK8, CCND1, MYC, CASP3, BCL2, BAX, BIRC5, TP53, MAPK3                                                              |
| 4     | hsa05210:  | Colorectal cancer                 | 11    | 2.77X10 <sup>-10</sup> | CASP9, GSK3B, MAPK8, CCND1, MYC, CASP3, BCL2, BAX, BIRC5, TP53, MAPK3                                                                                           |
| 5     | hsa04066:  | HIF-1 signaling pathway           | 12    | 1.47X10 <sup>-09</sup> | CDKN1A, CDKN1B, PDHA1, NOS2, EGF, STAT3, SERPINE1, BCL2, HMOX1, IGF1, MAPK3, VEGFA                                                                              |

Table S9: The biological functions of five Hub genes the are closely related in the progression of PCa.

| # | Symbol | Full name                                         | Function                                                                                                                                                                                                                                                                                                                                                                    |
|---|--------|---------------------------------------------------|-----------------------------------------------------------------------------------------------------------------------------------------------------------------------------------------------------------------------------------------------------------------------------------------------------------------------------------------------------------------------------|
| 1 | BUB1B  | BUB1 mitotic checkpoint serine/threonine kinase B | Is a critical mitotic checkpoint kinase. Is identified as the top-scoring kinase by RNA interaction. Has a possibility to be a novel antimitotic target and impaired spindle checkpoint function in any form of cancer, including PCa [55,94].                                                                                                                              |
| 2 | TOP2A  | DNA Topoisomerase II alpha                        | Is a critical nuclear enzyme for chromosome condensation, DNA mitosis, and cell division. May be utilized as a biomarker that indicates poor prognosis and may function as a treatment target for PCa. Has been suggested to directly interact with P53, a well-known tumor suppressor protein. Regulates the topology structure of DNA and cell cycle progression [50,51]. |
| 3 | UBE2C  | Ubiquitin-conjugating enzyme complex E2 C         | Plays as an independent prognostic factor of PCa, and recreated a critical role in the pathway of PCa (WNT- $\beta$ -catenin signaling pathway and NOTCH signaling pathway) [51].                                                                                                                                                                                           |
| 4 | RRM2   | Ribonucleotide reductase regulatory subunit M2    | Well-known as a functional catalytic site in controlling the cell cycle by regulating DNA repair and replication. An enzyme that determines the rate of DNA synthesis and repair. It was considered to be a biomarker to indicate recurrence in PCa patients with low risk [50,51].                                                                                         |
| 5 | CENPF  | Centromere protein F                              | Functions in the centromere-kinetochore complex and chromosomal segregation and the upregulation of CENPF are connected to aggressive PCa [53,54].                                                                                                                                                                                                                          |

Table S10: The variables that were inputted as categorical Covariates

| #  | Variables         | Value Description        | Detailed information                                                                                                                                                                              |
|----|-------------------|--------------------------|---------------------------------------------------------------------------------------------------------------------------------------------------------------------------------------------------|
| 1  | Age               | 20 - 49                  | Obtained from demographic data, and classified into three groups                                                                                                                                  |
|    |                   | 50 - 69                  |                                                                                                                                                                                                   |
|    |                   | ≥ 70                     |                                                                                                                                                                                                   |
| 2  | BMI               | < 25                     | Obtained from body measures data, and classified into three groups                                                                                                                                |
|    |                   | 25 to 30                 |                                                                                                                                                                                                   |
|    |                   | >30                      |                                                                                                                                                                                                   |
| 3  | Race              | Non-Hispanic White       | Obtained from demographic data, and classified into three groups                                                                                                                                  |
|    |                   | Non-Hispanic Black       |                                                                                                                                                                                                   |
|    |                   | Other Race               |                                                                                                                                                                                                   |
| 4  | Income            | ≤ \$24,999               | Obtained from demographic data, and classified into four groups                                                                                                                                   |
|    |                   | \$25,000 to \$ \$54,999  |                                                                                                                                                                                                   |
|    |                   | \$55,000 to \$74,999     |                                                                                                                                                                                                   |
|    |                   | ≥ \$74,999               |                                                                                                                                                                                                   |
| 5  | Education level   | ≤ 12 <sup>th</sup> grade | Obtained from demographic data, and classified into two groups                                                                                                                                    |
|    |                   | > 12 <sup>th</sup> grade |                                                                                                                                                                                                   |
| 6  | US Birth          | Yes                      | In what country were you born? U.S. born answer “yes or no”                                                                                                                                       |
|    |                   | No                       |                                                                                                                                                                                                   |
| 7  | Physical activity | Yes                      | Do you participate in a vigorous-intensity exercise which causes significant increases in breathing or heart rate (<10 min) continuously? “Yes or no”-did not they ask how often on a week or so? |
|    |                   | No                       |                                                                                                                                                                                                   |
| 8  | Eat frozen food   | Yes                      | During the past 30 days, how often did you eat frozen meals? “Yes or no”                                                                                                                          |
|    |                   | No                       |                                                                                                                                                                                                   |
| 9  | Alcohol use       | Yes                      | In any one year, have you had at least 12 drinks of any type of alcoholic beverage? “Yes or no”                                                                                                   |
|    |                   | No                       |                                                                                                                                                                                                   |
| 10 | Smoking           | Yes                      | Smoking status [“Have you smoked at least 100 cigarettes in your entire life? “Yes or no”                                                                                                         |
|    |                   | No                       |                                                                                                                                                                                                   |
| 11 | Liver diseases    | Yes                      | Were you diagnosed with liver diseases? “Yes or no”                                                                                                                                               |
|    |                   | No                       |                                                                                                                                                                                                   |
| 12 | Kidney disease    | Yes                      | Were you diagnosed with liver diseases? “Yes or no”                                                                                                                                               |
|    |                   | No                       |                                                                                                                                                                                                   |

Table S11: The variables that were inputted as numerical Covariates

| # | Variables* | Value Description |
|---|------------|-------------------|
| 1 | AGE        | Years             |
| 2 | WT         | Kg                |
| 3 | LBXTC      | mg/dl             |
| 4 | LDL        | mg/dl             |
| 5 | HDL        | mg/dl             |
| 6 | TRIGLY     | mg/dl             |

AGE: Age, WT: Weight, BXTc: total cholesterol, LDL: low-density lipoprotein (LDL), HDL: high-density lipoprotein, and TRIGLY: triglycerides (TRIGLY).
